# Supplementary material for: Aqueous SARA ATRP using inorganic sulfites
Source: Royal Society of Chemistry journal article supplement (doi:10.1039/c6py01779g), 2016-11-22
Supplement: c6py01779g1.pdf [file c6py01779g1.pdf]

## ***Supporting Information***

### **Aqueous SARA ATRP using Inorganic Sulfites**

Carlos M. R. Abreu,<sup>a,b</sup> Liye Fu,<sup>b</sup> Sheiliza Carmali,<sup>b</sup> Arménio C. Serra,<sup>a</sup> Krzysztof Matyjaszewski<sup>\*b</sup> and Jorge F. J. Coelho<sup>\*a</sup>

<sup>a</sup>*CEMUC, Department of Chemical Engineering, University of Coimbra, 3030-790 Coimbra, Portugal. E-mail: jcoelho@eq.uc.pt*

<sup>b</sup>*Department of Chemistry, Carnegie Mellon University, 4400 Fifth Avenue, Pittsburgh, Pennsylvania 15213, USA. E-mail: km3b@andrew.cmu.edu*

## Experimental Section

### Materials

Oligo(ethylene oxide) methyl ether acrylate (OEOMA<sub>480</sub>, 99%, average molecular weight 480, Sigma-Aldrich) and oligo(ethylene oxide) methyl ether methacrylate (OEOMA<sub>500</sub>, 99%, average molecular weight 500, Aldrich) were passed over a column of basic alumina (Fisher Scientific) prior to use. Na<sub>2</sub>S<sub>2</sub>O<sub>4</sub> (Sigma-Aldrich, 85 %), Na<sub>2</sub>S<sub>2</sub>O<sub>5</sub> (Sigma-Aldrich, >99 %), NaHSO<sub>3</sub> (Sigma-Aldrich, >99 %), 2-hydroxyethyl 2-bromoisobutyrate (HEBiB, 95%, Sigma-Aldrich), copper(II) bromide (99.99%, Sigma-Aldrich), sodium chloride (NaCl, 99.5%, Fisher Scientific), tetraethylammonium chloride (TEACl, 98%, Sigma-Aldrich), sodium bromide (NaBr, 99.5%, Fisher Scientific), bovine serum albumin (BSA, ≥98%, Sigma-Aldrich), water (H<sub>2</sub>O, HPLC grade, Fisher Scientific), N,N-dimethylformamide (DMF, ACS grade, Fisher Scientific), deuterium oxide (D<sub>2</sub>O, 99.9%, Cambridge Isotope Laboratories), and anhydrous magnesium sulfate (99%, Aldrich) were used as received. 1X PBS solution was prepared from 10X PBS (Thermo Fisher Scientific) and HPLC grade water. Tris(pyridin-2-ylmethyl)amine (TPMA),<sup>1</sup> tris[2-(dimethylamino)ethyl]amine (Me<sub>6</sub>TREN)<sup>2</sup> and BSA protein initiator (BSA-O-[iBBR]<sub>30</sub>)<sup>3</sup> were prepared as previously reported in the literature.

### Techniques

A syringe pump (KDS Scientific, Legato 101) was used for the continuous feeding of the sulfites at the rate 1 μL/min (different sulfite aqueous solutions were prepared to obtain different FR<sub>S</sub>).

<sup>1</sup>H nuclear magnetic resonance (NMR) spectroscopy measurements were performed on a Bruker Avance 500 MHz spectrometer and used to determine the monomer conversion in D<sub>2</sub>O.

The chromatographic parameters of the samples were determined using a gel permeation chromatography (GPC) system equipped with a Waters 515 HPLC pump and a Waters 2414 refractive index detector using PSS columns (Styrogel 10<sup>2</sup>, 10<sup>3</sup>, 10<sup>5</sup> Å) with DMF containing 10 mM LiBr as the eluent at a flow rate of 1 mL/min at 50 °C. The system was calibrated

with low dispersity PMMA ( $M_n = 800 - 1\,820\,000$ ) standards. Before the injection (50  $\mu\text{L}$ ) the samples were filtered through a polytetrafluoroethylene (PTFE) membrane with 0.22  $\mu\text{m}$  pore.

The UV-Visible studies were performed using an Agilent 8453 UV-Vis Spectrometer. Dynamic light scattering (DLS) measurements were performed on a Malvern Zetasizer Nano ZS at 25 °C.

Sodium dodecyl sulfate-polyacrylamide gel electrophoresis (SDS-PAGE) was performed with a Bio-Rad Laboratories Mini-Protean TGX™ Precast Gels (7.5%). Staining was accomplished with Coomassie blue and washed in DI water overnight.

### **General Procedure for Aqueous SARA ATRP of OEOA**

A series of aqueous SARA ATRP using OEOA as monomer were carried out with systematically different conditions to establish the optimal reactions conditions. The conditions used for polymerization of OEOA<sub>480</sub> generally followed this procedure: NaCl (58.4 mg, 1.0 mmol), OEOA<sub>480</sub> (2.40 g, 5 mmol), 100 mM stock solution HEBiB (0.2 mL, 0.02 mmol), stock solution of 25 mM CuBr<sub>2</sub> and 200 mM TPMA (40  $\mu\text{L}$ , 1.0  $\mu\text{mol}$  of CuBr<sub>2</sub> and 8  $\mu\text{mol}$  of TPMA) were dissolved in H<sub>2</sub>O (7.7 mL). DMF (0.1 mL) was added as internal standard for <sup>1</sup>H NMR analysis. This mixture was added to a 25 mL Schlenk flask and purged with nitrogen for 30 min, and then the flask was placed in an oil bath at 30 °C. A Na<sub>2</sub>S<sub>2</sub>O<sub>4</sub> aqueous solution (64 mM) was purged with nitrogen, and the solution was continuously injected into the reaction medium using a syringe pump at the rate 1  $\mu\text{L}/\text{min}$ . Samples were taken throughout the reaction for GPC and NMR analysis.

### **Synthesis of “One-pot” POEOMA-*b*-POEOA Block Copolymer**

NaCl (58.4 mg, 1.0 mmol), OEOMA<sub>500</sub> (2.50 g, 5 mmol), 100 mM stock solution HEBiB (1.0 mL, 0.10 mmol), stock solution of 25 mM CuBr<sub>2</sub> and 200 mM TPMA (200  $\mu\text{L}$ , 5.0  $\mu\text{mol}$  of CuBr<sub>2</sub> and 40  $\mu\text{mol}$  of TPMA) were dissolved in H<sub>2</sub>O (7.7 mL). DMF (0.1 mL) was added as internal standard for <sup>1</sup>H NMR analysis. This mixture was added to a 25 mL Schlenk flask, purged with nitrogen for 30 min, and the flask was placed in an oil bath at 30 °C. A Na<sub>2</sub>S<sub>2</sub>O<sub>4</sub> aqueous solution (64 mM) was purged with nitrogen, and the solution was continuously

injected into the reaction medium using a syringe pump at the rate 1  $\mu\text{L}/\text{min}$ . Samples were taken throughout the reaction for GPC and NMR analysis. The polymerization proceeded for 18 h (98% conversion,  $M_n^{\text{th}} = 24600$ ,  $M_n^{\text{GPC}} = 26200$ ,  $M_w/M_n = 1.22$ ). After that, under continuous flow of nitrogen the excess of polymerization mixture was removed from Schlenk flask until reach a volume of 0.5 mL (POEOMA: 125 mg, 5  $\mu\text{mol}$ ;  $\text{CuBr}_2$ : 2.8  $\mu\text{g}$ , 0.0125  $\mu\text{mol}$ ; TPMA: 29  $\mu\text{g}$ , 0.10  $\mu\text{mol}$ ). The OEOA<sub>480</sub> (2.40 g, 5 mmol) and  $\text{H}_2\text{O}$  (7.7 mL) previously bubbled with nitrogen for about 15 minutes were added. An additional  $\text{Na}_2\text{S}_2\text{O}_4$  solution (8 mM) was purged with nitrogen, and the solution was continuously injected into the reaction medium using a syringe pump at the rate 1  $\mu\text{L}/\text{min}$  allowed to copolymerize for 20 h.

### **Grafting from the Protein Initiator BSA-O-[iBBr]<sub>30</sub>**

BSA-O-[iBBr]<sub>30</sub> (25.0 mg (protein), 0.01 mmol (initiator)), OEOA<sub>480</sub> (1.20 g, 2.5 mmol), stock solution of 25 mM  $\text{CuBr}_2$  and 200 mM TPMA (20  $\mu\text{L}$ , 0.50  $\mu\text{mol}$   $\text{CuBr}_2$  and 4.0  $\mu\text{mol}$  TPMA) were dissolved in 0.1 M PBS (7.7 mL). DMF (0.1 mL) was added as internal standard for  $^1\text{H}$  NMR analysis. This mixture was added to a 25 mL Schlenk flask, purged with nitrogen for 30 min, and then placed in an oil bath at 30  $^\circ\text{C}$ . A  $\text{Na}_2\text{S}_2\text{O}_4$  aqueous solution (16 mM) was purged with nitrogen, and the solution was continuously injected into the reaction medium using a syringe pump at the rate 1  $\mu\text{L}/\text{min}$ . The grafted polymers were cleaved from the protein by adding 200  $\mu\text{L}$  of the reaction mixture to 200  $\mu\text{L}$  of 5% KOH solution. The resulting solution was allowed to react for 2 h at room temperature, followed by GPC analysis, as described elsewhere.<sup>3</sup>

## **Results**

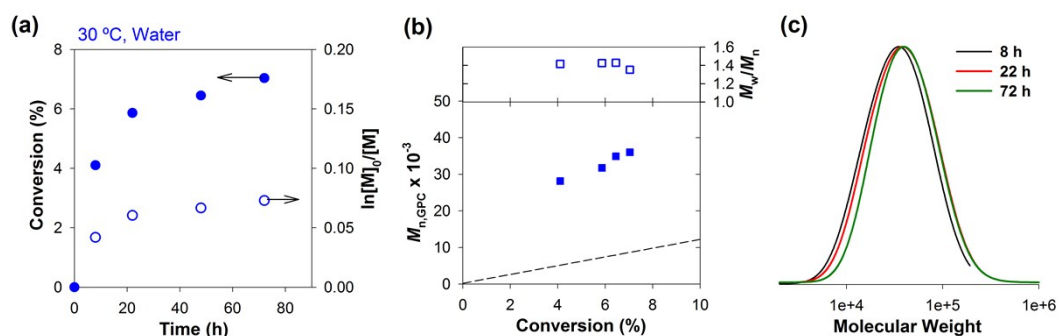

**Fig. S1** (a) Kinetic plots of conversion and  $\ln[M]_0/[M]$  vs. time; (b) plot of number-average molecular weights ( $M_{n, GPC}$ ) and  $\bar{D}$  ( $M_w/M_n$ ) vs. conversion for aqueous SARA ATRP of OEOA<sub>480</sub> at 30 °C; and (c) GPC traces vs. time. Conditions:  $[OEOA_{480}]_0/[HEBiB]_0/[Na_2S_2O_4]_0/[Cu(II)Br_2]_0/[TPMA]_0 = 250/1/1/0.05/0.4$ ;  $[NaCl]_0 = 100$  mM;  $[OEOA_{480}]_0/[Water] = 1/3$ .

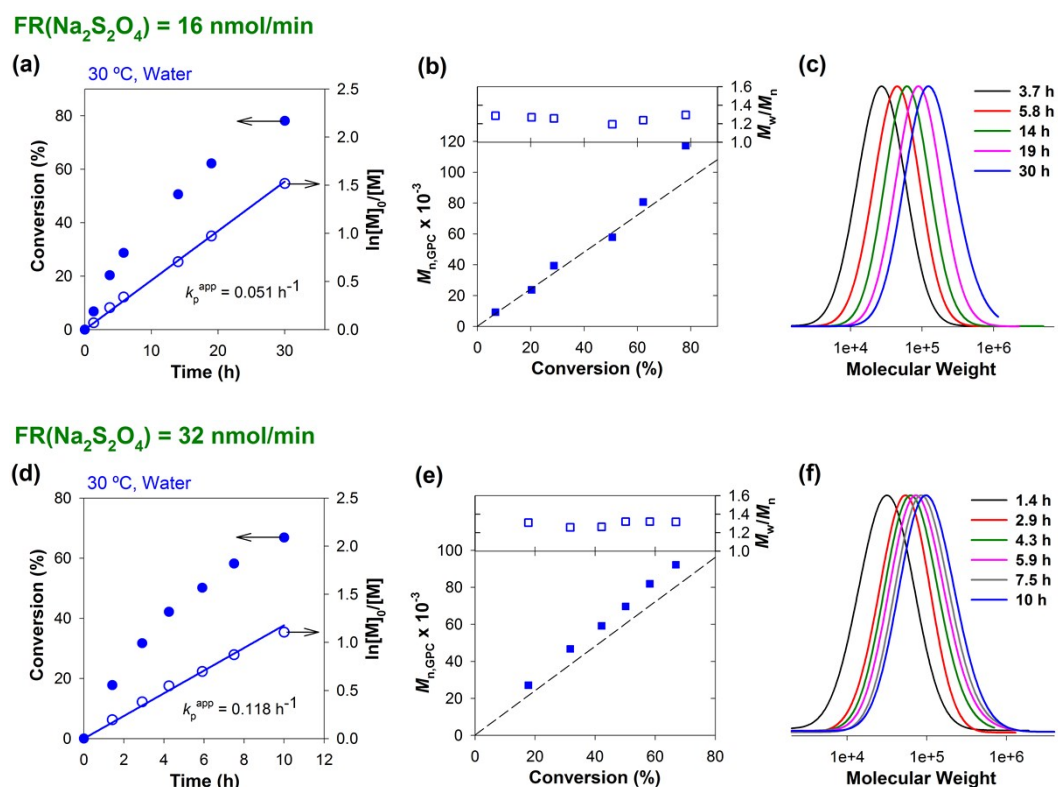

**Fig. S2** (a and d) Kinetic plots of conversion and  $\ln[M]_0/[M]$  vs. time; (b and e) plot of  $M_{n, GPC}$  and  $\bar{D}$  ( $M_w/M_n$ ) vs. conversion for aqueous SARA ATRP of OEOA<sub>480</sub> at 30 °C; and (c and f) GPC traces vs. time. Conditions:  $[OEOA_{480}]_0/[HEBiB]_0/[Cu(II)Br_2]_0/[TPMA]_0 = 250/1/0.05/0.4$ ;  $FR(Na_2S_2O_4) = 16$  (a, b and c) and 32 (d, e and f) nmol/min;  $[NaCl]_0 = 100$  mM;  $[OEOA_{480}]_0/[Water] = 1/3$ .

A higher  $FR_S = 64$  nmol/min was employed at the beginning of polymerization up to 50% of monomer conversion. After that moment, the  $FR_S$  was reduced to 8 nmol/min (Fig. S3).

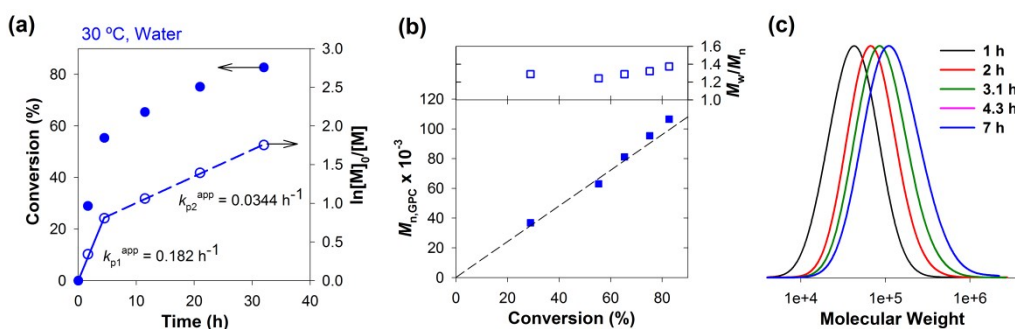

**Fig. S3** (a) Kinetic plots of conversion and  $\ln[M]_0/[M]$  vs. time; (b) plot of number-average molecular weights ( $M_{n,GPC}$ ) and  $\bar{D}$  ( $M_w/M_n$ ) vs. conversion for aqueous SARA ATRP of OEOA<sub>480</sub> at 30 °C; and (c) GPC traces vs. time. Conditions:  $[OEOA_{480}]_0/[HEBiB]_0/[Cu(II)Br_2]_0/[TPMA]_0 = 250/1/0.05/0.4$ ;  $FR(Na_2S_2O_4) = 64 \text{ nmol/min}$  (until 4.5h) and  $FR(Na_2S_2O_4) = 8 \text{ nmol/min}$  (until 32h);  $[NaCl]_0 = 100 \text{ mM}$ ;  $[OEOA_{480}]_0/[Water] = 1/3$ .

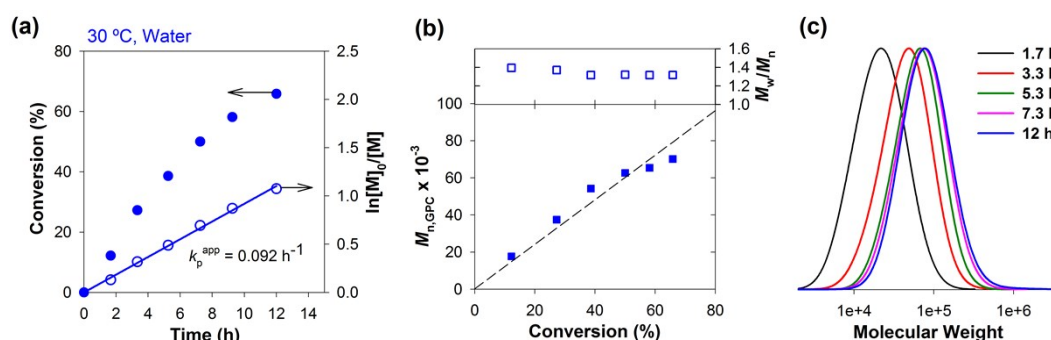

**Fig. S4** (a) Kinetic plots of conversion and  $\ln[M]_0/[M]$  vs. time; (b) plot of  $M_{n,GPC}$  and  $\bar{D}$  ( $M_w/M_n$ ) vs. conversion for aqueous SARA ATRP of OEOA<sub>480</sub> at 30 °C; and (c) GPC traces vs. time. Conditions:  $[OEOA_{480}]_0/[HEBiB]_0/[Cu(II)Br_2]_0/[TPMA]_0 = 250/1/0.05/0.1$ ;  $FR(Na_2S_2O_4) = 64 \text{ nmol/min}$ ;  $[NaCl]_0 = 100 \text{ mM}$ ;  $[OEOA_{480}]_0/[Water] = 1/3$ .

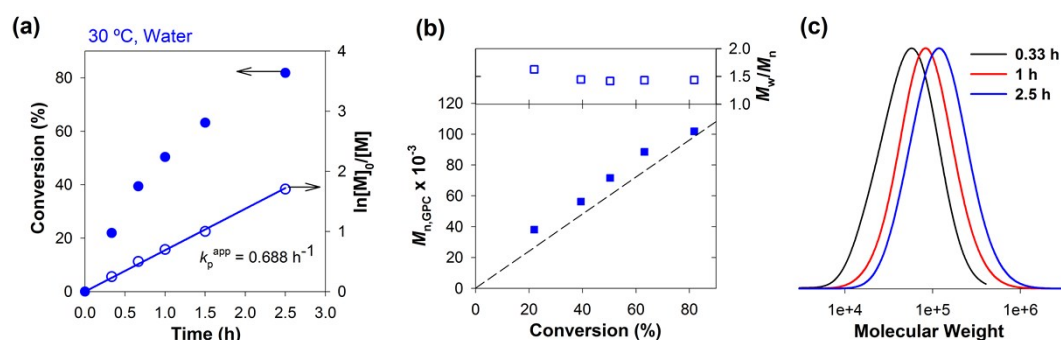

**Fig. S5** (a) Kinetic plots of conversion and  $\ln[M]_0/[M]$  vs. time; (b) plot of  $M_{n,GPC}$  and  $\bar{D}$  ( $M_w/M_n$ ) vs. conversion for aqueous SARA ATRP of OEOA<sub>480</sub> at 30 °C; and (c) GPC traces vs. time. Conditions:  $[OEOA_{480}]_0/[HEBiB]_0/[Cu(II)Br_2]_0/[Me_6TREN]_0 = 250/1/0.05/0.4$ ;  $FR(Na_2S_2O_4) = 64 \text{ nmol/min}$ ;  $[NaCl]_0 = 100 \text{ mM}$ ;  $[OEOA_{480}]_0/[Water] = 1/3$ .

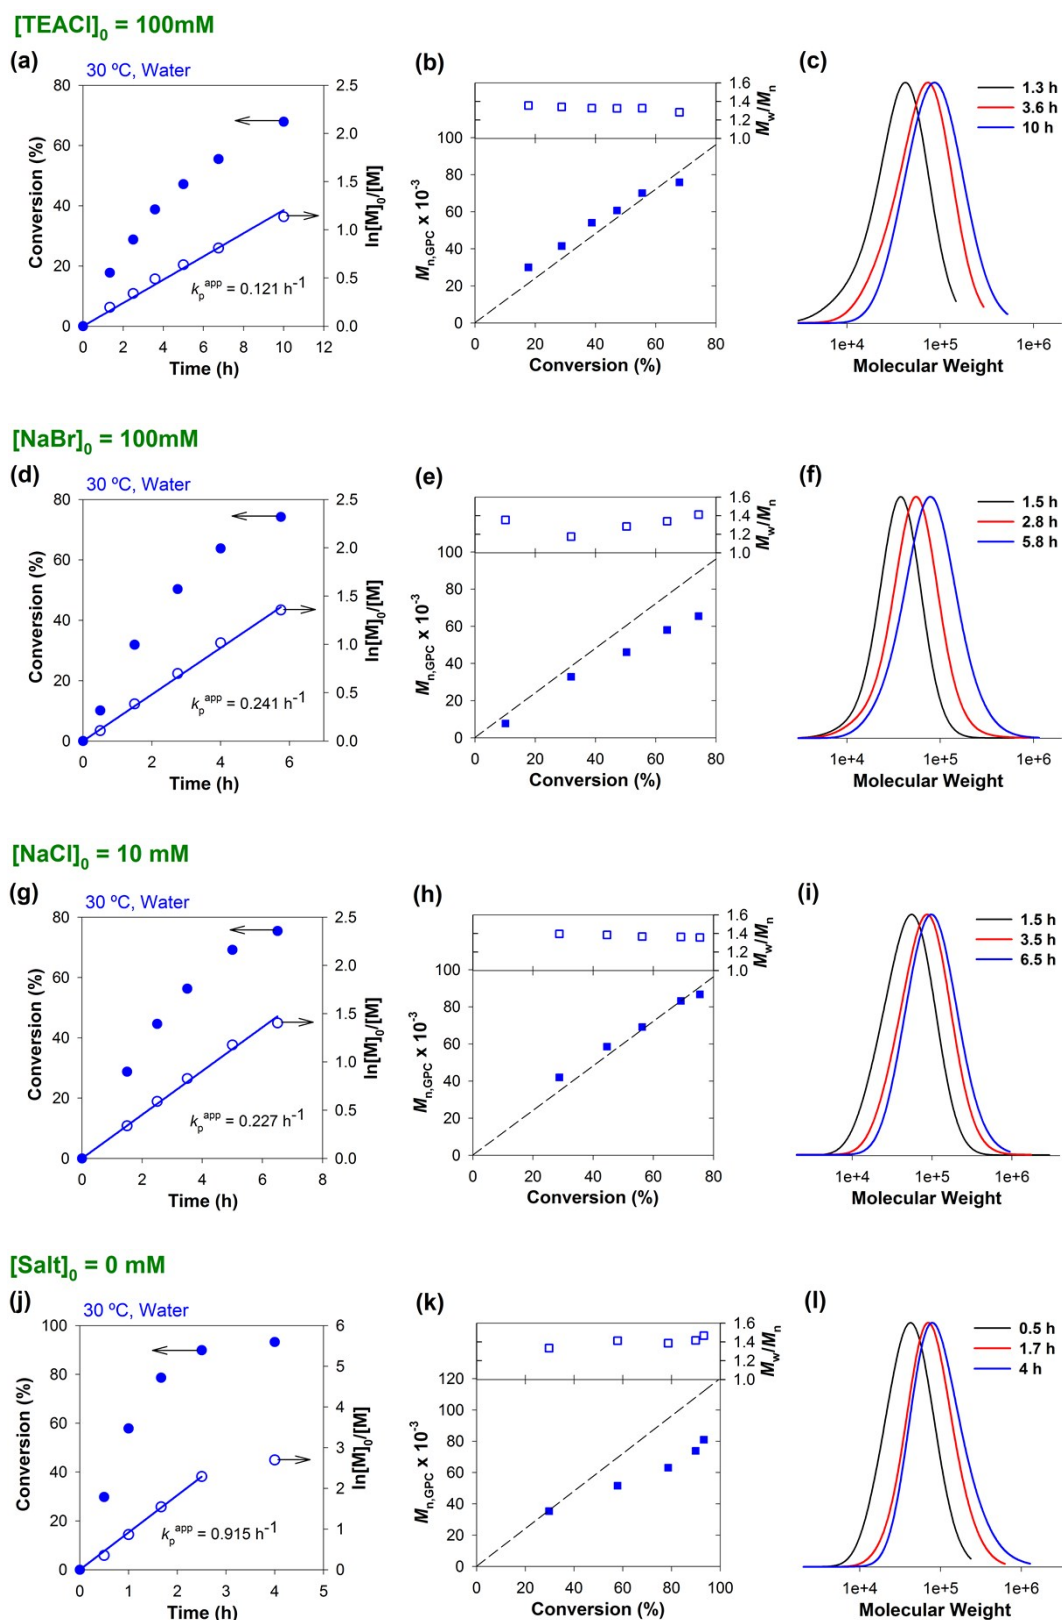

**Fig. S6** (a, d, g and j) Kinetic plots of conversion and  $\ln[M]_0/[M]$  vs. time; (b, e, h and k) plot of  $M_{n, GPC}$  and  $\bar{M}_w/\bar{M}_n$  vs. conversion for aqueous SARA ATRP of OEOA<sub>480</sub> at 30 °C; and (c, f, i and l) GPC traces vs. time. Conditions: [OEOA<sub>480</sub>]<sub>0</sub>/[HEBiB]<sub>0</sub>/[Cu(II)Br<sub>2</sub>]<sub>0</sub>/[TPMA]<sub>0</sub> = 250/1/0.05/0.4; FR(Na<sub>2</sub>S<sub>2</sub>O<sub>4</sub>) = 64 nmol/min; [OEOA<sub>480</sub>]<sub>0</sub>/[Water] = 1/3; (a, b and c) [TEACl]<sub>0</sub> = 100 mM, (d, e and f) [NaBr]<sub>0</sub> = 100 mM, (g, h and i) [NaCl]<sub>0</sub> = 10 mM, and (j, k and l) [Salt]<sub>0</sub> = 0 mM.

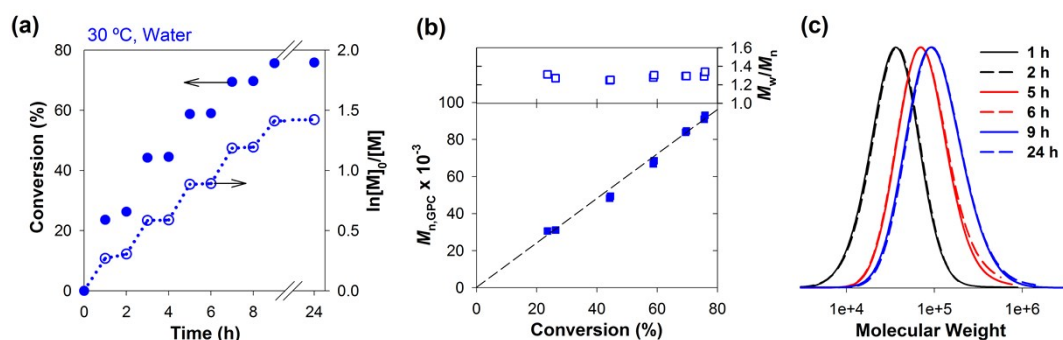

**Fig. S7** (a) Kinetic plots of conversion and  $\ln[M]_0/[M]$  vs. time; (b) plot of  $M_{n, GPC}$  and  $\bar{D} (M_w/M_n)$  vs. conversion for aqueous SARA ATRP of OEOA<sub>480</sub> at 30 °C; and (c) GPC traces vs. time. Conditions:  $[OEOA_{480}]_0/[HEBiB]_0/[Cu(II)Br_2]_0/[TPMA]_0 = 250/1/0.05/0.1$ ;  $FR(Na_2S_2O_4) = 64$  nmol/min;  $[NaCl]_0 = 100$  mM;  $[OEOA_{480}]_0/[Water] = 1/3$ .

**Table S1** Aqueous SARA ATRP of OEOA<sub>480</sub> with Start/Stop Cycles.

| Entry <sup>a</sup> | $[M]_0/[I]_0/[Cu(II)Br_2]_0/[TPMA]_0$ | Sulfite                                       | Cu <sup>b</sup> (ppm) | Time (h)     | Conv. (%) | $M_n^{th} \times 10^{-3}$ | $M_n^{GPC} \times 10^{-3}$ | $\bar{D}$ |
|--------------------|---------------------------------------|-----------------------------------------------|-----------------------|--------------|-----------|---------------------------|----------------------------|-----------|
| 1                  | 250/1/0.05/0.4                        | Na <sub>2</sub> S <sub>2</sub> O <sub>4</sub> | 26                    | 1 (1 h OFF)  | 24        | 28.5                      | 30.6                       | 1.31      |
|                    |                                       |                                               |                       | 3 (1 h OFF)  | 44        | 53.3                      | 48.3                       | 1.25      |
|                    |                                       |                                               |                       | 5 (1 h OFF)  | 59        | 70.7                      | 66.9                       | 1.28      |
|                    |                                       |                                               |                       | 7 (1 h OFF)  | 69        | 83.5                      | 83.9                       | 1.29      |
|                    |                                       |                                               |                       | 9 (15 h OFF) | 76        | 90.9                      | 90.9                       | 1.29      |

<sup>a</sup>All polymerizations were conducted with  $[M]_0 = 0.5$  M,  $[I]_0 = 2$  mM,  $[NaCl]_0 = 100$  mM and  $FR_s = 64$  nmol/min;  
<sup>b</sup>Calculated by the initial weight ratio of Cu to the monomer.

## References

1. Z. Tyeklar, R. R. Jacobson, N. Wei, N. N. Murthy, J. Zubieta and K. D. Karlin, *J. Am. Chem. Soc.*, 1993, **115**, 2677-2689.
2. M. Ciampolini and N. Nardi, *Inorg. Chem.*, 1966, **5**, 41-44.
3. S. Averick, A. Simakova, S. Park, D. Konkolewicz, A. J. D. Magenau, R. A. Mehl and K. Matyjaszewski, *ACS Macro Lett.*, 2012, **1**, 6-10.
